# Supplementary material for: Amorphous MnO 2 with low-coordinated Mn sites for efficient electrochemical urea production from CO 2 and NO
Source: Royal Society of Chemistry journal article supplement (doi:10.1039/d5nj03566j), 2025-01-01
Supplement: d5nj03566j1.pdf [file d5nj03566j1.pdf]

# **Supporting Information**

## Experimental Section

### Synthesis of $\alpha$ -MnO<sub>2</sub>

All reagents were analytical reagent grade without further purification. Typically, KMnO<sub>4</sub> (50 mg) and NaH<sub>2</sub>PO<sub>2</sub>·H<sub>2</sub>O (70 mg) were respectively dissolved in 60 mL deionized water to generate KMnO<sub>4</sub> solution and NaH<sub>2</sub>PO<sub>2</sub> solution. Then, KMnO<sub>4</sub> solution was quickly added to NaH<sub>2</sub>PO<sub>2</sub> solution at 35°C with constant stirring. Afterwards, the mixed solution was cooled down to room temperature and the precipitates were collected by centrifuging, washed twice with deionized water, and finally dried at 60 °C for 12 h to obtain  $\alpha$ -MnO<sub>2</sub>.  $\gamma$ -MnO<sub>2</sub> was prepared by annealing  $\alpha$ -MnO<sub>2</sub> in O<sub>2</sub> atmosphere for 2 h.

### Electrochemical experiments in MEA cell

Electrochemical experiments were conducted using a zero-gap membrane electrode assembly (MEA) electrolyzer. The setup consisted of two titanium current collector plates (cathode and anode) with serpentine flow channels, separated by two 300  $\mu$ m PTFE gaskets. All potentials were referenced to a reversible hydrogen electrode (RHE) by  $E$  (V vs. RHE) =  $E$  (V vs. Ag/AgCl) + 0.198 V + 0.059  $\times$  pH. The catalyst slurry was prepared by dissolving 25 mg of the catalyst in 3 mL of isopropanol with 20  $\mu$ L of Nafion ionomer solution (5 wt% in H<sub>2</sub>O). Next, the catalyst slurry was slowly dropped onto the carbon paper (Sigracet 29 BC) to attain a catalyst loading of  $\sim$ 0.5 mg cm<sup>-2</sup> as a gas diffusion layer (GDL). Nickel mesh was used as the anode and Ag/AgCl served as the reference electrode. An anion exchange membrane (Fumasep FAA-3-PK-75) was used to separate the cathode and anode chambers. The catholyte was a solution containing 0.1 M KHCO<sub>3</sub>, while the anolyte consisted of a 1 M KOH solution. The catholyte was purged with Ar prior to the electrochemical experiments. During the electrolysis, the humidified NO/CO<sub>2</sub> mixed gas was fed from the non-catalyst side of the GDL, while anolyte was continuously cycled at a rate of 20 mL min<sup>-1</sup> under pump drive. After electrolysis for 1 h, the produced urea was quantitatively determined by the urease decomposition method.

### Determination of urea

Urea concentration was detected via urease decomposition method<sup>1</sup>. Typically, 0.2 mL of urease solution with concentration of 5 mg mL<sup>-1</sup> was added into 2 mL of urea electrolyte, and the reaction is carried out in a thermostatic oscillator at 37°C for 40 min. Urea was decomposed by urease into CO<sub>2</sub> and two NH<sub>3</sub> molecules. After the decomposition, NH<sub>3</sub> concentration of urea electrolyte with urease ( $c_{\text{urease}}$ ) was measured using the indole blue method. Meanwhile, NH<sub>3</sub> concentration contained in urea electrolyte without urease ( $c_{\text{NH}_3}$ ) was also quantified by indophenol blue method. The concentration of urea in the electrolyte ( $c_{\text{urea}}$ ) was calculated by the following equation.

$$c_{\text{urea}} = (c_{\text{urease}} - c_{\text{NH}_3}) / 2 \quad (1)$$

The urea yield rate and  $\text{FE}_{\text{urea}}$  were calculated by the following equation:

$$\text{Urea yield rate} = (c_{\text{urea}} \times V) / (60.06 \times t \times A) \quad (2)$$

$$\text{FE}_{\text{urea}} (\%) = (10 \times F \times c \times V) / (60.06 \times Q) \times 100\% \quad (3)$$

where  $c_{\text{urea}}$  (μg mL<sup>-1</sup>) is the measured urea concentration,  $V$  (mL) is the volume of the electrolyte,  $t$  (h) is the reduction time,  $A$  (cm<sup>2</sup>) is the surface area of cathode,  $F$  (96 500 C mol<sup>-1</sup>) is the Faraday constant,  $Q$  (C) is the quantity of applied electricity.

### Determination of NH<sub>3</sub>

NH<sub>3</sub> in electrolyte was quantitatively determined by the indophenol blue method<sup>2</sup>. Typically, 2 mL of electrolyte was removed from the electrochemical reaction vessel and diluted with deionized water. Then 2 mL of diluted solution was removed into a clean vessel followed by sequentially adding NaOH solution (2 mL, 1 M) containing C<sub>7</sub>H<sub>6</sub>O<sub>3</sub> (5 wt.%) and C<sub>6</sub>H<sub>5</sub>Na<sub>3</sub>O<sub>7</sub> (5 wt.%), NaClO (1 mL, 0.05 M), and C<sub>5</sub>FeN<sub>6</sub>Na<sub>2</sub>O (0.2 mL, 1wt.%) aqueous solution. After the incubation for 2 h at room temperature, the mixed solution was subjected to UV-vis measurement using the absorbance at 655 nm wavelength. The concentration-absorbance curves were calibrated by the standard NH<sub>4</sub>Cl solution with a series of concentrations.

### Characterizations

X-ray diffraction (XRD) was conducted on a Rigaku D/max 2400 diffractometer. Transmission electron microscopy (TEM) and high-resolution transmission electron microscopy (HRTEM) were performed on a Tecnai G2 F20 microscope at an

acceleration voltage of 200 kV. Electron paramagnetic resonance (EPR) measurements were conducted on a Bruker ESP-300 spectrometer. Online differential electrochemical mass spectrometry (DEMS, QAS 100) was carried out by QAS 100 spectrometer.

### Calculation details

Density functional theory (DFT) calculations were carried out using a Cambridge sequential total energy package (CASTEP). The exchange-correlation function was utilized by Perdew-Burke-Ernzerhof (PBE) generalized gradient approximation (GGA) functional. To ensure all atoms were fully relaxed for each system, a cutoff energy of 400 eV was chosen and the  $3 \times 3 \times 1$  Monkhorst-Pack mesh was used in Brillouin zone sampling. The model was optimized to converge the absolute energy to  $1.0 \times 10^{-5}$  eV with a force convergence of  $0.02 \text{ eV } \text{\AA}^{-1}$ . The Gibbs free energy ( $\Delta G$ , 298 K) of reaction steps is calculated by:

$$\Delta G = \Delta E + \Delta ZPE - T\Delta S \quad (4)$$

where  $\Delta E$  is the adsorption energy,  $\Delta ZPE$  is the zero-point energy difference and  $T\Delta S$  is the entropy difference between the gas phase and adsorbed state. The entropies of free gases were acquired from the NIST database.

The adsorption energy ( $\Delta E$ ) is defined as:

$$\Delta E = E_{\text{ads/slab}} - E_{\text{ads}} - E_{\text{slab}} \quad (5)$$

where  $E_{\text{ads/slab}}$ ,  $E_{\text{ads}}$  and  $E_{\text{slab}}$  are the total energies for adsorbed species on slab, adsorbed species and isolated slab, respectively. The transition states of each reaction steps are analyzed by a combined linear synchronous transit and quadratic synchronous transit tools (LST/QST)<sup>3</sup>.

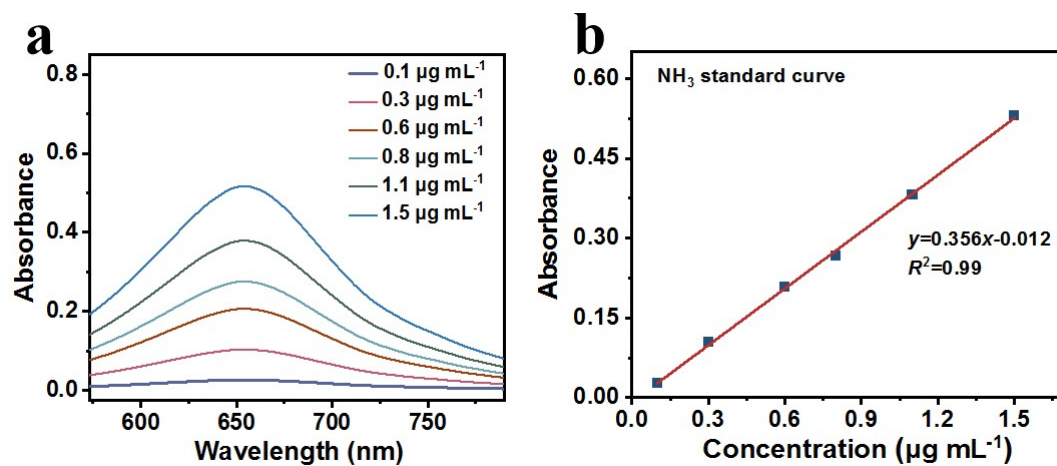

Fig. S1. (a) UV-vis absorption spectra of  $\text{NH}_4\text{Cl}$  assays after incubated for 2 h at ambient conditions. (b) Calibration curve used for the calculation of  $\text{NH}_3$  concentrations.

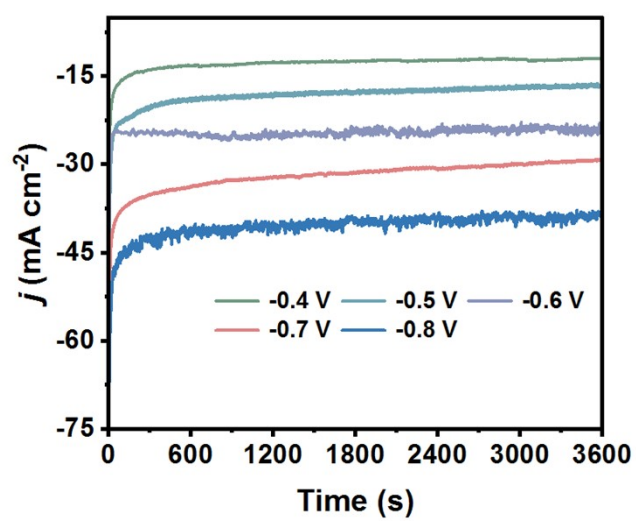

Fig. S2. Chronoamperometry curves of a-MnO<sub>2</sub> at various potentials after 1 h of EUCN electrolysis.

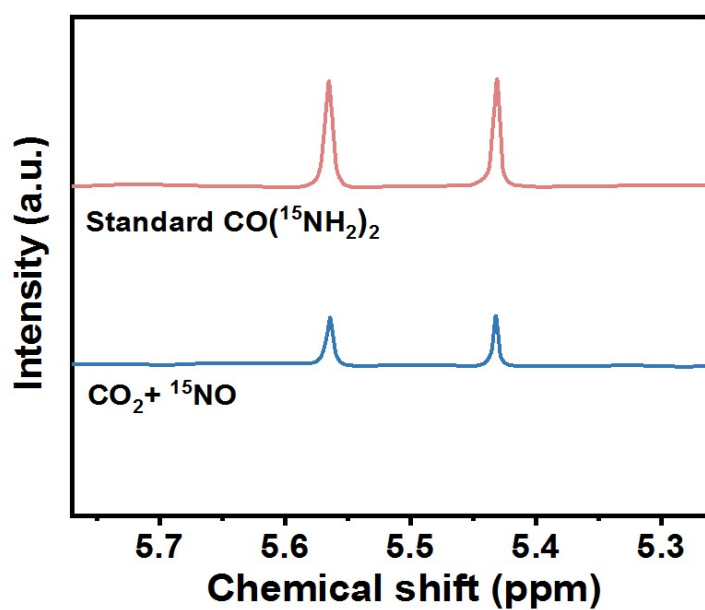

Fig. S3.  $^1\text{H}$  NMR spectra of  $\text{CO}(^{15}\text{NH}_2)_2$  standard sample and those fed by  $^{15}\text{NO}$  after electrolysis at -0.7 V.

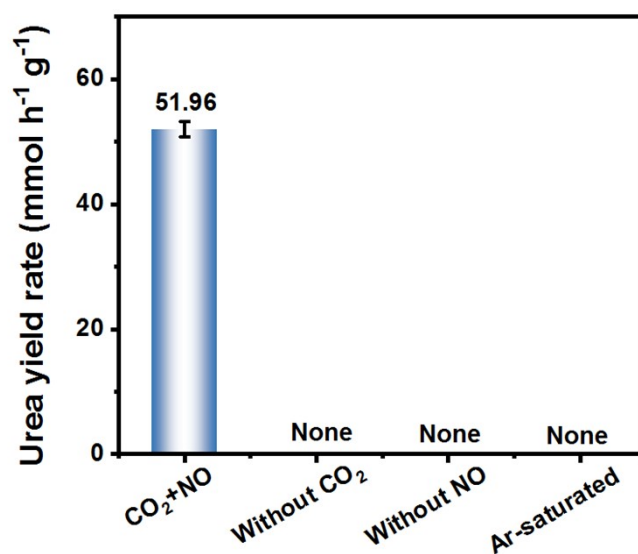

Fig. S4. Amounts of produced urea on a- $\text{MnO}_2$  under different conditions: (1) electrolysis in a mixed  $\text{CO}_2/\text{NO}$ -saturated gas electrolyte at -0.7 V, (2) electrolysis in NO-saturated but  $\text{CO}$ -free electrolyte at -0.7 V, (3) electrolysis in  $\text{CO}_2$ -saturated but NO-free electrolyte at -0.7 V, (4) electrolysis in Ar-saturated electrolyte at -0.7 V.

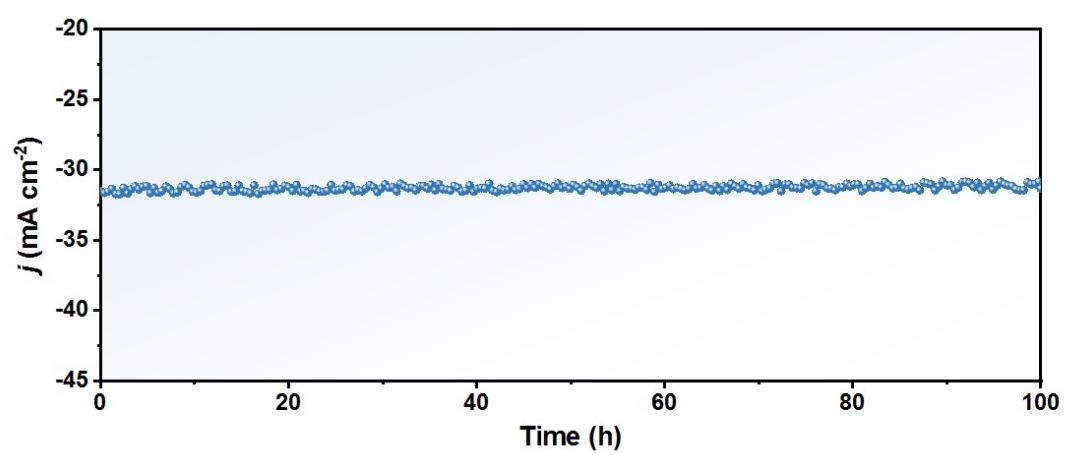

Fig. S5. Long-term stability test of a-MnO<sub>2</sub> in MEA at -0.7 V.

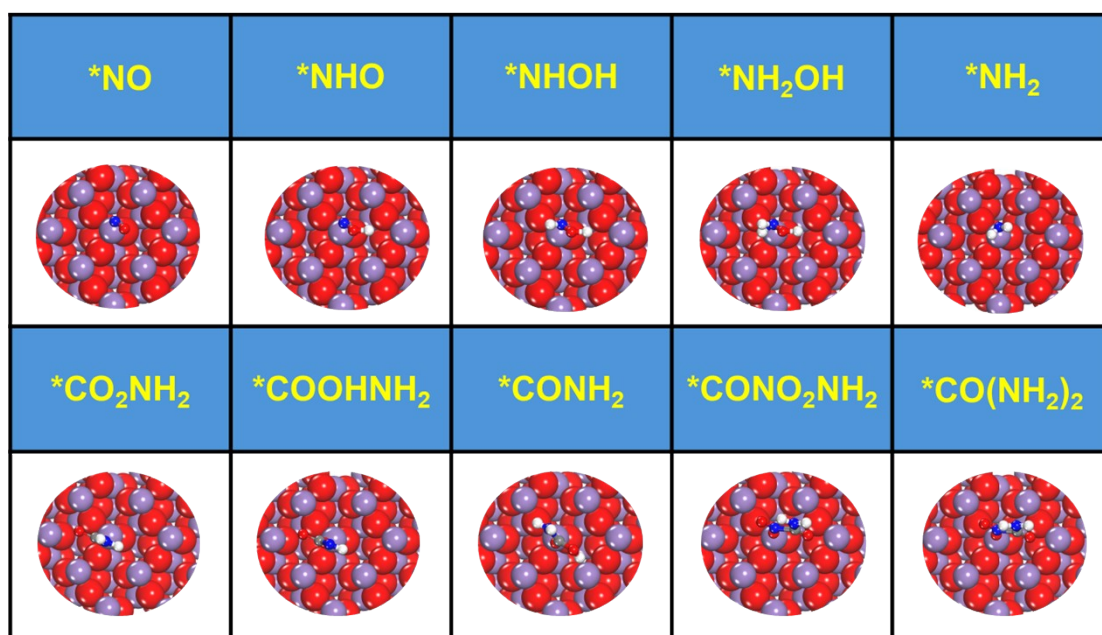

Fig. S6. Optimized atomic configurations of the reaction intermediates on c-MnO<sub>2</sub>.

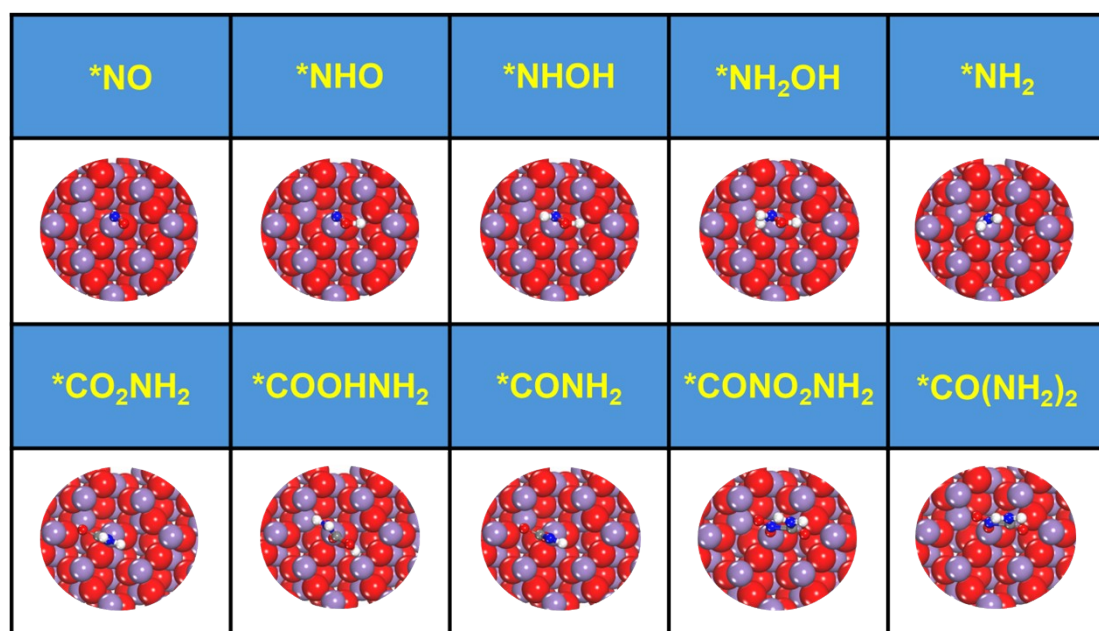

Fig. S7. Optimized atomic configurations of the reaction intermediates on  $\alpha$ -MnO<sub>2</sub>.

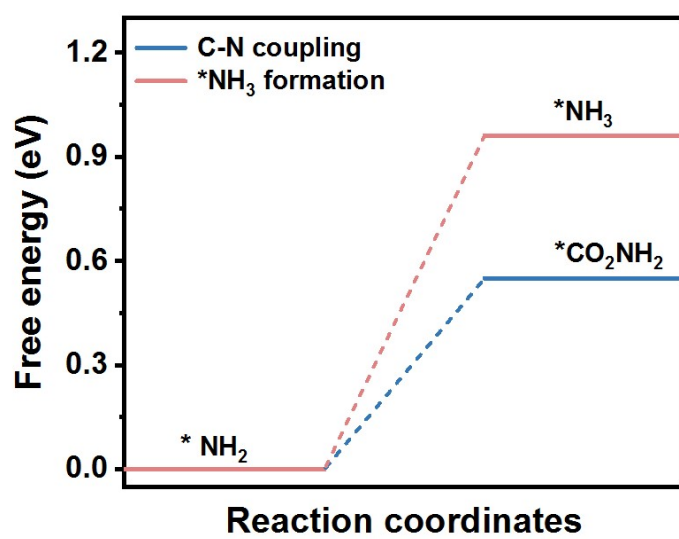

Fig. S8. Free energy profiles of competition between  $*NH_2 \rightarrow *CO_2NH_2$  and  $*NH_2 \rightarrow *NH_3$  conversion on a-MnO<sub>2</sub>.

Table S1. Comparison of the optimum urea yield rate and  $FE_{\text{urea}}$  for the recently reported state-of-the-art urea electrocatalysts at ambient conditions.

| Catalyst                                          | C/N sources                                    | Urea yield rate<br>(mmol g <sup>-1</sup> h <sup>-1</sup> ) | $FE_{\text{urea}}$<br>(%) | Potential<br>(V vs.<br>RHE) | Ref.                 |
|---------------------------------------------------|------------------------------------------------|------------------------------------------------------------|---------------------------|-----------------------------|----------------------|
| InOOH                                             | CO <sub>2</sub> + N <sub>2</sub>               | 6.85                                                       | 20.97                     | -0.4                        | 4                    |
| Pd <sub>1</sub> Cu <sub>1</sub> -TiO <sub>2</sub> | CO <sub>2</sub> + N <sub>2</sub>               | 10.0                                                       | 22.54                     | -0.5                        | 5                    |
| Zn-Mn                                             | CO <sub>2</sub> + N <sub>2</sub>               | 4.14                                                       | 63.5                      | -0.3                        | 6                    |
| CoRuN <sub>6</sub>                                | CO <sub>2</sub> + NO <sub>3</sub> <sup>-</sup> | 8.98                                                       | 25.31                     | -0.6                        | 7                    |
| Cu-Bi                                             | CO <sub>2</sub> + NO <sub>3</sub> <sup>-</sup> | 36.3                                                       | 23.5                      | -0.6                        | 8                    |
| VB <sub>12</sub> -CNTs                            | CO <sub>2</sub> + NO <sub>3</sub> <sup>-</sup> | 2.73                                                       | 26.04                     | -0.5                        | 9                    |
| Co-O-C                                            | CO <sub>2</sub> + NO <sub>3</sub> <sup>-</sup> | 45.03                                                      | 31.4                      | -1.5                        | 10                   |
| SrRuO <sub>3</sub>                                | CO <sub>2</sub> + NO <sub>3</sub> <sup>-</sup> | 25.07                                                      | 34.1                      | -0.7                        | 11                   |
| Cu-Ni                                             | CO <sub>2</sub> + NO <sub>3</sub> <sup>-</sup> | 22.01                                                      | 25.1                      | -0.5                        | 12                   |
| Zn NBs                                            | CO <sub>2</sub> + NO                           | 15.13                                                      | 11.16                     | -0.92                       | 13                   |
| <b>a-MnO<sub>2</sub></b>                          | <b>CO<sub>2</sub> + NO</b>                     | <b>51.96</b>                                               | <b>36.69</b>              | <b>-0.7</b>                 | <b>This<br/>work</b> |

## References

1. X. Wei, X. Wen, Y. Liu, C. Chen, C. Xie, D. Wang, M. Qiu, N. He, P. Zhou and W. Chen, *J. Am. Chem. Soc.*, 2022, **144**, 11530-11535.
2. P. Li, Z. Jin, Z. Fang and G. Yu, *Energy Environ. Sci.*, 2021, **14**, 3522-3531.
3. Q. Jiang, Z. Ao and Q. Jiang, *Phys. Chem. Chem. Phys.*, 2013, **15**, 10859-10865.
4. M. Yuan, J. Chen, Y. Xu, R. Liu, T. Zhao, J. Zhang, Z. Ren, Z. Liu, C. Streb and H. He, *Energy Environ. Sci.*, 2021, **14**, 6605-6615.
5. L. Pan, J. Wang, F. Lu, Q. Liu, Y. Gao, Y. Wang, J. Jiang, C. Sun, J. Wang and X. Wang, *Angew. Chem.*, 2023, **135**, e202216835.
6. X. Zhang, X. Zhu, S. Bo, C. Chen, K. Cheng, J. Zheng, S. Li, X. Tu, W. Chen and C. Xie, *Angew. Chem.*, 2023, **135**, e202305447.
7. C. Liu, H. Tong, P. Wang, R. Huang, P. Huang, G. Zhou and L. Liu, *Appl. Catal., B*, 2023, **336**, 122917.
8. X. Song, X. Ma, T. Chen, L. Xu, J. Feng, L. Wu, S. Jia, L. Zhang, X. Tan and R. Wang, *J. Am. Chem. Soc.*, 2024, **146**, 25813-25823.
9. M. Cong, Q. Liu, D. Wang, S. Hao, Z. Han, H. Xu, M. Guo, X. Ding and Y. Gao, *Appl. Catal., B*, 2024, **351**, 123941.
10. S. Zhang, M. Jin, H. Xu, X. Zhang, T. Shi, Y. Ye, Y. Lin, L. Zheng, G. Wang, Y. Zhang, H. Yin, H. Zhang and H. Zhao, *Energy Environ. Sci.*, 2024, **17**, 1950-1960.
11. L. Lv, H. Tan, Y. Kong, B. Tang, Q. Ji, Y. Liu, C. Wang, Z. Zhuang, H. Wang and M. Ge, *Angew. Chem.*, 2024, **136**, e202401943.
12. Y. Zhou, B. Yang, Z. Huang, G. Chen, J. Tang, M. Liu, X. Liu, R. Ma, Z. Mei and N. Zhang, *Appl. Catal., B*, 2024, **343**, 123577.
13. Y. Huang, R. Yang, C. Wang, N. Meng, Y. Shi, Y. Yu and B. Zhang, *ACS Energy Lett.*, 2021, **7**, 284-291.
